# Supplementary material for: Study of the influence of nuclear spin and dilution over the slow relaxation in a 3d4f heterobimetallic single-molecule magnet
Source: Royal Society of Chemistry journal article supplement (doi:10.1039/d1dt01608c), 2021-01-01
Supplement: d1dt01608c1.pdf [file d1dt01608c1.pdf]

Supporting Information for

Study of the nuclear spin and dilution influence  
over the slow relaxation in a 3d4f heterobimetallic  
Single-Molecule Magnet

**Jessica Flores González, Bertrand Lefeuvre, Bastien Degraeve, Olivier Cador,\* Fabrice Pointillart\***

*Univ Rennes, CNRS, ISCR (Institut des Sciences Chimiques de Rennes) - UMR 6226, 35000  
Rennes, France*

**Table S1.** Crystallographic data for  $\text{DyZn}_2$ ,  $^{162}\text{DyZn}_2$ ,  $^{163}\text{DyZn}_2$ ,  $(\text{Dy@Y})\text{Zn}_2$ ,  $^{162}(\text{Dy@Y})\text{Zn}_2$  and  $^{163}(\text{Dy@Y})\text{Zn}_2$ .

|                         |                                                                                                                                   |                                                                                                                               |                                                                                                                               |
|-------------------------|-----------------------------------------------------------------------------------------------------------------------------------|-------------------------------------------------------------------------------------------------------------------------------|-------------------------------------------------------------------------------------------------------------------------------|
| Compounds               | $[(\text{ZnL})_2\text{DyCl}_3]\cdot 2\text{H}_2\text{O}$<br><b><math>\text{DyZn}_2</math></b>                                     | $[(\text{ZnL})_2^{162}\text{DyCl}_3]\cdot 2\text{H}_2\text{O}$<br><b><math>^{162}\text{DyZn}_2</math></b>                     | $[(\text{ZnL})_2^{163}\text{DyCl}_3]\cdot 2\text{H}_2\text{O}$<br><b><math>^{163}\text{DyZn}_2</math></b>                     |
| Crystal system          | monoclinic                                                                                                                        | monoclinic                                                                                                                    | monoclinic                                                                                                                    |
| Cell parameters         | a = 16.6(1) Å<br>b = 23.3(2) Å<br>c = 14.6(1) Å<br>$\alpha = 90^\circ$<br>$\beta = 104.8(1)^\circ$<br>$\gamma = 90^\circ$         | a = 16.00(3) Å<br>b = 22.24(5) Å<br>c = 14.17(3) Å<br>$\alpha = 90^\circ$<br>$\beta = 104.59(5)^\circ$<br>$\gamma = 90^\circ$ | a = 16.21(2) Å<br>b = 22.66(2) Å<br>c = 14.25(1) Å<br>$\alpha = 90^\circ$<br>$\beta = 105.06(3)^\circ$<br>$\gamma = 90^\circ$ |
| Volume / Å <sup>3</sup> | 5490(137)                                                                                                                         | 4883(30)                                                                                                                      | 5053(16)                                                                                                                      |
| T / K                   | 293(2)                                                                                                                            | 150(2)                                                                                                                        | 150(2)                                                                                                                        |
|                         |                                                                                                                                   |                                                                                                                               |                                                                                                                               |
| Compounds               | $\text{Dy}_{0.1}\text{Y}_{0.9}(\text{ZnL})_2$<br><b><math>(\text{Dy@Y})\text{Zn}_2</math></b>                                     | $^{163}\text{Dy}_{0.1}\text{Y}_{0.9}(\text{ZnL})_2$<br><b><math>(^{163}\text{Dy@Y})\text{Zn}_2</math></b>                     | $^{162}\text{Dy}_{0.1}\text{Y}_{0.9}(\text{ZnL})_2$<br><b><math>(^{162}\text{Dy@Y})\text{Zn}_2</math></b>                     |
| Crystal system          | monoclinic                                                                                                                        | monoclinic                                                                                                                    | monoclinic                                                                                                                    |
| Cell parameters         | a = 16.114(2) Å<br>b = 22.449(3) Å<br>c = 14.233(2) Å<br>$\alpha = 90^\circ$<br>$\beta = 104.371(5)^\circ$<br>$\gamma = 90^\circ$ | a = 15.94(3) Å<br>b = 22.39(5) Å<br>c = 14.11(3) Å<br>$\alpha = 90^\circ$<br>$\beta = 104.58(7)^\circ$<br>$\gamma = 90^\circ$ | a = 16.17(3) Å<br>b = 22.62(5) Å<br>c = 14.28(2) Å<br>$\alpha = 90^\circ$<br>$\beta = 104.71(6)^\circ$<br>$\gamma = 90^\circ$ |
| Volume / Å <sup>3</sup> | 4987(2)                                                                                                                           | 4874(28)                                                                                                                      | 5053(27)                                                                                                                      |
| T / K                   | 150(2)                                                                                                                            | 150(2)                                                                                                                        | 293(2)                                                                                                                        |

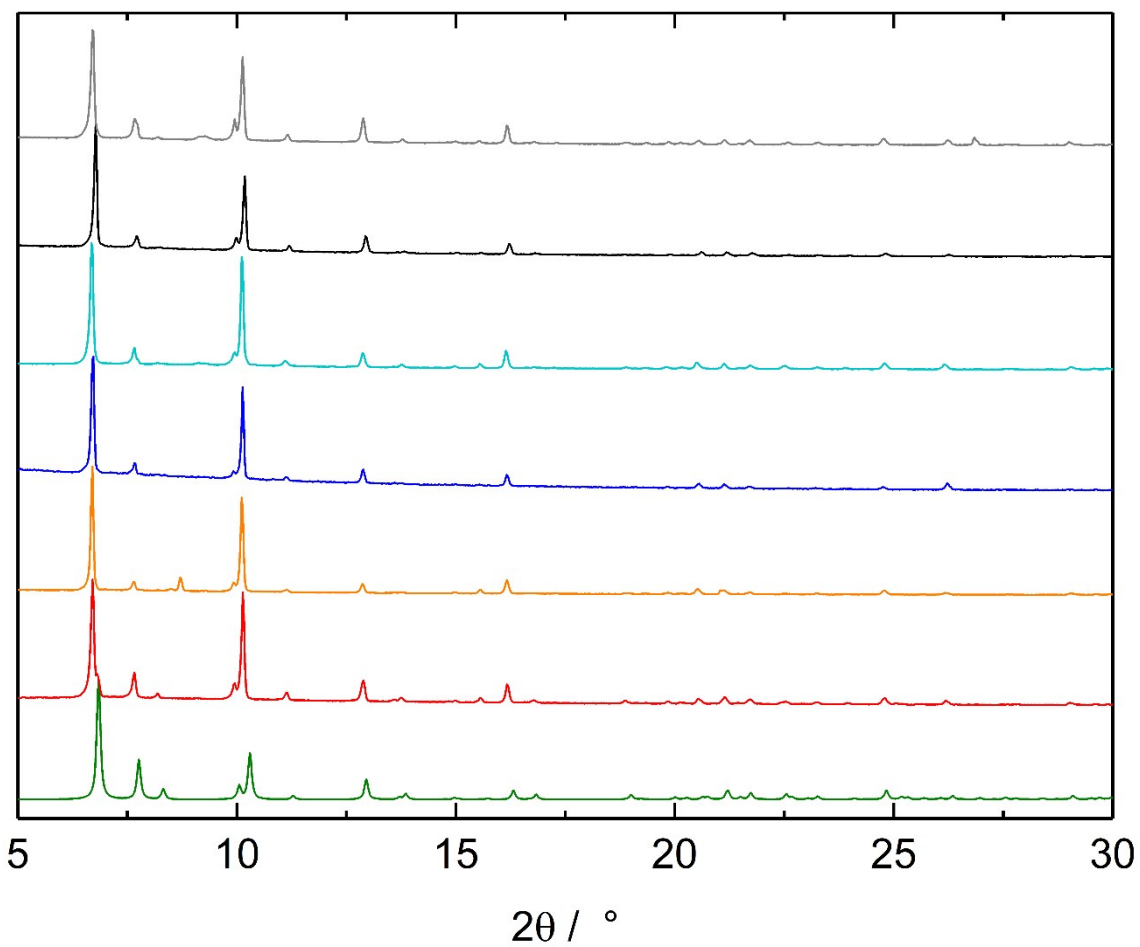

**Fig. S1** Powder X-Ray Diffraction pattern of  $^{162}\text{DyZn}_2$  (red),  $^{163}\text{DyZn}_2$  (blue),  $\text{DyZn}_2$  (black),  $(^{162}\text{Dy@Y})\text{Zn}_2$  (orange),  $(^{163}\text{Dy@Y})\text{Zn}_2$  (light blue), and  $(\text{Dy@Y})\text{Zn}_2$  (grey) with the simulated pattern from single crystal crystallographic structure (green).

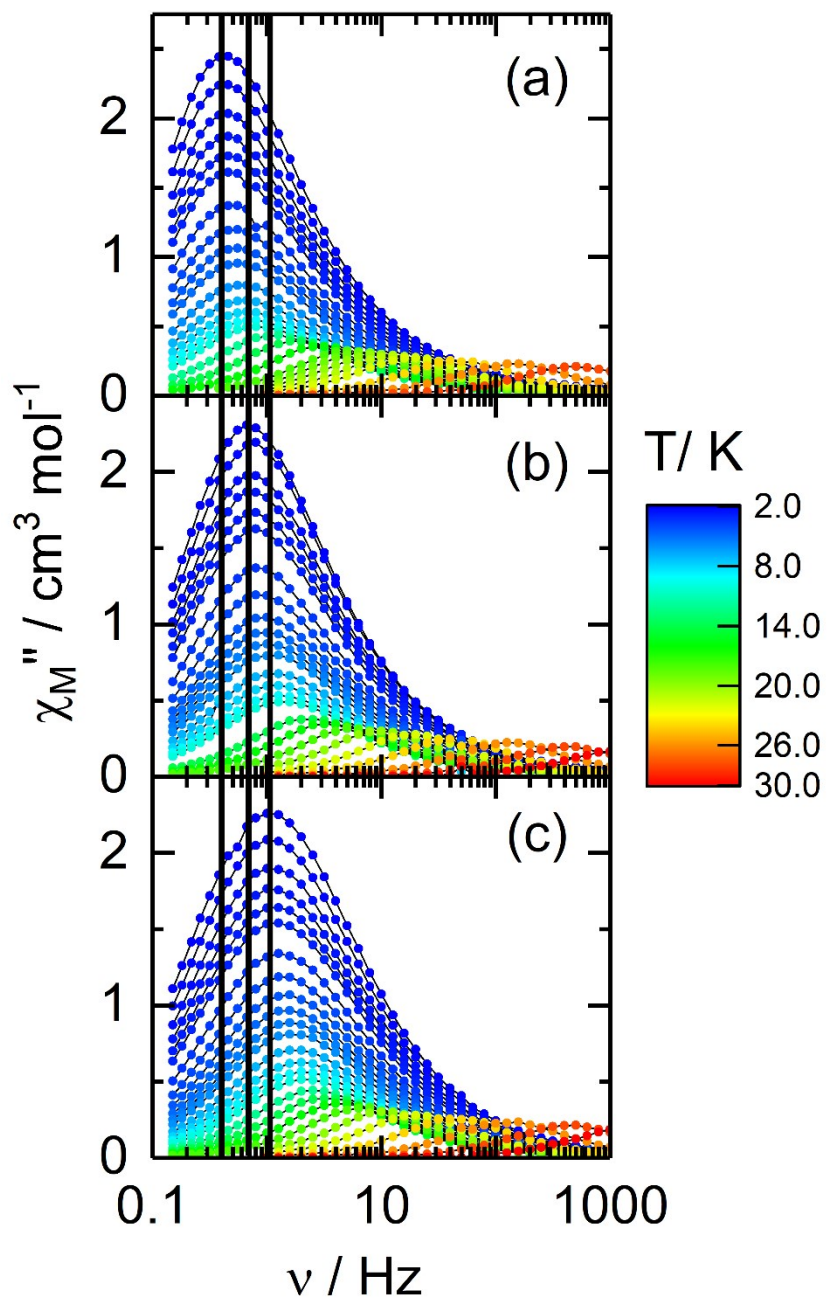

**Fig. S2** Frequency dependence of the out-of-phase component of the ac susceptibility measured in zero dc field for a)  $^{162}\text{DyZn}_2$ , b)  $\text{DyZn}_2$ , and c)  $^{163}\text{DyZn}_2$ .

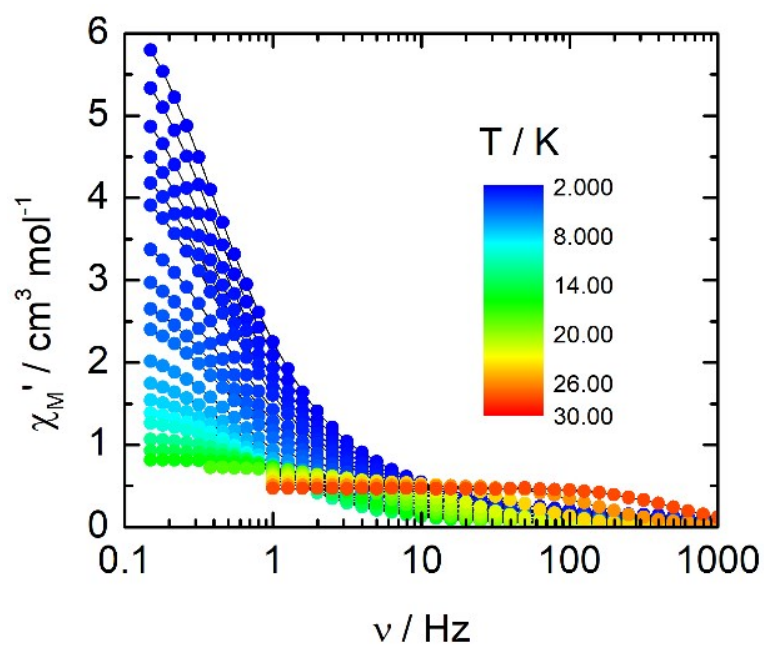

**Fig. S3** Frequency dependence of the in-phase component of the ac susceptibility measured in zero dc field for  $^{162}\text{DyZn}_2$ .

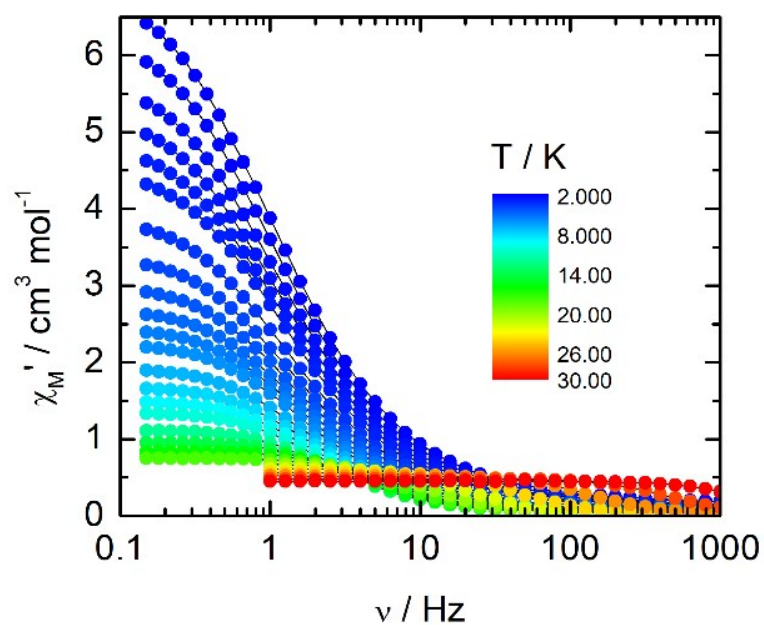

**Fig. S4** Frequency dependence of the in-phase component of the ac susceptibility measured in zero dc field for  $^{163}\text{DyZn}_2$ .

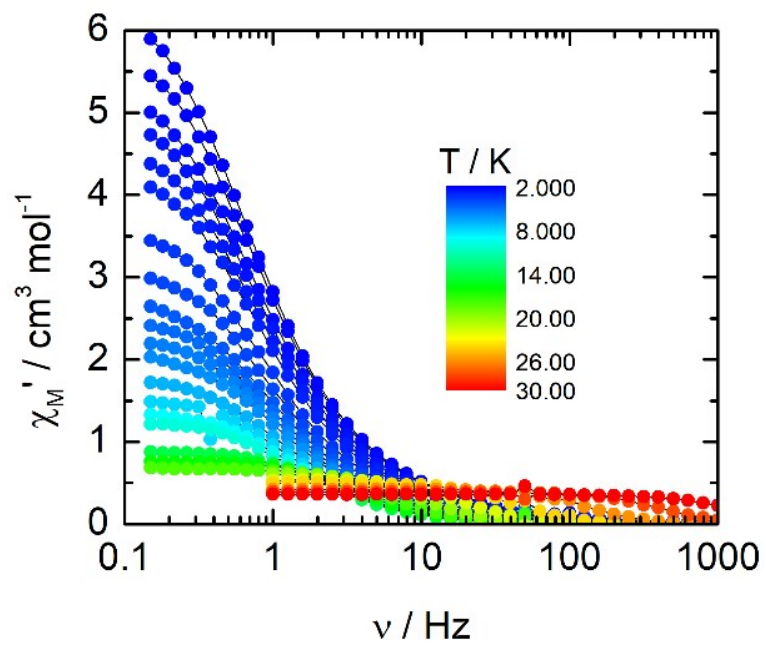

**Fig. S5** Frequency dependence of the in-phase component of the ac susceptibility measured in zero dc field for **DyZn<sub>2</sub>**.

**Extended Debye model:**

$$\chi_M' = \chi_S + (\chi_T - \chi_S) \frac{1 + (\omega\tau)^{1-\alpha} \sin\left(\alpha \frac{\pi}{2}\right)}{1 + 2(\omega\tau)^{1-\alpha} \sin\left(\alpha \frac{\pi}{2}\right) + (\omega\tau)^{2-2\alpha}}$$

$$\chi_M'' = (\chi_T - \chi_S) \frac{(\omega\tau)^{1-\alpha} \cos\left(\alpha \frac{\pi}{2}\right)}{1 + 2(\omega\tau)^{1-\alpha} \sin\left(\alpha \frac{\pi}{2}\right) + (\omega\tau)^{2-2\alpha}}$$

With  $\chi_T$  the isothermal susceptibility,  $\chi_S$  the adiabatic susceptibility,  $\tau$  the relaxation time and  $\alpha$  an empiric parameter which describe the distribution of the relaxation time. For SMM with only one relaxing object  $\alpha$  is close to zero. The extended Debye model was applied to fit simultaneously the experimental variations of  $\chi_M'$  and  $\chi_M''$  with the frequency  $\nu$  of the oscillating field ( $\omega = 2\pi\nu$ ). Typically, only the temperatures for which a maximum on the  $\chi_M''$  vs.  $\nu$  curves, have been considered (see Fig. here below for an example). The best fitted parameters  $\tau$ ,  $\alpha$ ,  $\chi_T$ ,  $\chi_S$  are listed in Table S4 to S6 with the coefficient of determination  $R^2$ .

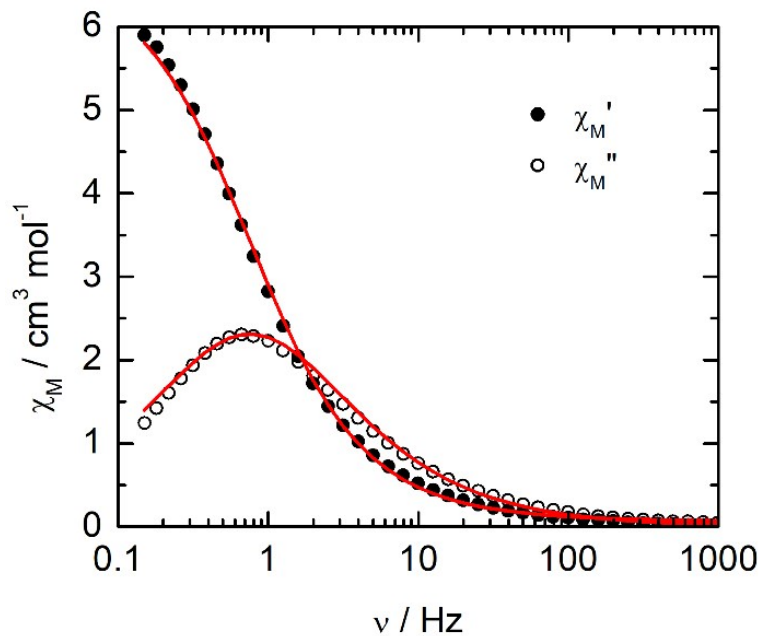

**Fig. S6** Frequency dependence of the in-phase ( $\chi_M'$ ) and out-of-phase ( $\chi_M''$ ) components of the ac susceptibility measured at 2 K and in zero field with the best fitted curves (red lines) with extended Debye model for **DyZn<sub>2</sub>**.

**Table S2.** Best fitted parameters ( $\chi_T$ ,  $\chi_S$ ,  $\tau$  and  $\alpha$ ) with the extended Debye model for compound **DyZn<sub>2</sub>** at zero field in the temperature range 2-30 K.

| T / K | $\chi_S / \text{cm}^3 \text{mol}^{-1}$ | $\chi_T / \text{cm}^3 \text{mol}^{-1}$ | $\tau / \text{s}$ | $\alpha$ | R <sup>2</sup> |
|-------|----------------------------------------|----------------------------------------|-------------------|----------|----------------|
| 2     | 0.06364                                | 6.76759                                | 0.20956           | 0.2313   | 0.99883        |
| 2.2   | 0.05261                                | 6.31192                                | 0.20076           | 0.23460  | 0.99909        |
| 2.4   | 0.04870                                | 5.73907                                | 0.19732           | 0.23041  | 0.99909        |
| 2.6   | 0.04202                                | 5.40171                                | 0.19248           | 0.22864  | 0.99898        |
| 2.8   | 0.03456                                | 5.00450                                | 0.18790           | 0.22855  | 0.99899        |
| 3     | 0.03359                                | 4.65074                                | 0.18308           | 0.22564  | 0.99907        |
| 3.5   | 0.02683                                | 3.87878                                | 0.17187           | 0.21653  | 0.99889        |
| 4     | 0.02286                                | 3.35228                                | 0.16090           | 0.21216  | 0.99861        |
| 4.5   | 0.00178                                | 2.92428                                | 0.15163           | 0.21654  | 0.99871        |
| 5     | 0.01456                                | 2.65793                                | 0.14625           | 0.20724  | 0.99862        |
| 5.5   | 0.00122                                | 2.41672                                | 0.13780           | 0.20455  | 0.99845        |
| 6     | 0.01119                                | 2.19950                                | 0.13152           | 0.19935  | 0.99887        |
| 7     | 0.01094                                | 1.86396                                | 0.12377           | 0.19289  | 0.99852        |
| 8     | 2.00E-17                               | 1.60925                                | 0.11741           | 0.19878  | 0.99136        |
| 9     | 1.00E-18                               | 1.42252                                | 0.10714           | 0.17877  | 0.99874        |
| 10    | 1.00E-17                               | 1.30001                                | 0.10092           | 0.16527  | 0.99785        |
| 14    | 2.00E-19                               | 0.90082                                | 0.06211           | 0.10913  | 0.99650        |
| 16    | 1.00E-19                               | 0.77292                                | 0.04185           | 0.06794  | 0.99656        |
| 18    | 1.00E-19                               | 0.68093                                | 0.02686           | 0.05004  | 0.99684        |
| 20    | 1.00E-20                               | 0.61398                                | 0.01577           | 0.00990  | 0.99523        |
| 22    | 2.00E-19                               | 0.54277                                | 0.00829           | 0.00000  | 0.99783        |
| 24    | 1.00E-17                               | 0.50052                                | 0.00363           | 0.01740  | 0.99444        |
| 26    | 1.00E-17                               | 0.42284                                | 0.00120           | 0.00000  | 0.99478        |
| 28    | 1.00E-17                               | 0.38701                                | 0.00040           | 0.00764  | 0.99243        |
| 30    | 2.00E-15                               | 0.36664                                | 0.00012           | 0.04032  | 0.99161        |



**Table S3.** Best fitted parameters ( $\chi_T$ ,  $\chi_S$ ,  $\tau$  and  $\alpha$ ) with the extended Debye model for compound  $^{162}\text{DyZn}_2$  at zero field in the temperature range 2-30 K.

| T / K | $\chi_S / \text{cm}^3 \text{mol}^{-1}$ | $\chi_T / \text{cm}^3 \text{mol}^{-1}$ | $\tau / \text{s}$ | $\alpha$ | $R^2$   |
|-------|----------------------------------------|----------------------------------------|-------------------|----------|---------|
| 2     | 0.18631                                | 7.2569                                 | 0.14328           | 0.27431  | 0.99984 |
| 2.2   | 0.17554                                | 6.64902                                | 0.13978           | 0.2691   | 0.99982 |
| 2.4   | 0.16166                                | 6.01877                                | 0.135             | 0.26446  | 0.99979 |
| 2.6   | 0.15356                                | 5.5293                                 | 0.13086           | 0.25913  | 0.99977 |
| 2.8   | 0.14612                                | 5.12011                                | 0.12692           | 0.25358  | 0.99975 |
| 3     | 0.13878                                | 4.76358                                | 0.1229            | 0.24863  | 0.99972 |
| 3.5   | 0.12309                                | 4.06371                                | 0.11432           | 0.23734  | 0.99968 |
| 4     | 0.11311                                | 3.5335                                 | 0.10681           | 0.22577  | 0.99965 |
| 4.5   | 0.10103                                | 3.13599                                | 0.10037           | 0.22017  | 0.99947 |
| 5     | 0.09566                                | 2.80741                                | 0.09529           | 0.21193  | 0.99956 |
| 6     | 0.0844                                 | 2.32908                                | 0.08713           | 0.19861  | 0.99952 |
| 7     | 0.07559                                | 1.99164                                | 0.08062           | 0.18796  | 0.99955 |
| 8     | 0.06709                                | 1.73955                                | 0.0749            | 0.17877  | 0.99951 |
| 9     | 0.06351                                | 1.54245                                | 0.07028           | 0.16678  | 0.99947 |
| 10    | 0.0622                                 | 1.38657                                | 0.06593           | 0.15664  | 0.99931 |
| 12    | 0.05537                                | 1.14269                                | 0.05586           | 0.13316  | 0.99938 |
| 14    | 0.05011                                | 0.97606                                | 0.04462           | 0.1029   | 0.99948 |
| 16    | 0.04466                                | 0.85155                                | 0.03303           | 0.07653  | 0.99935 |
| 18    | 0.04218                                | 0.75363                                | 0.02241           | 0.05173  | 0.99967 |
| 20    | 0.0364                                 | 0.68224                                | 0.01404           | 0.0433   | 0.99953 |
| 22    | 0.03485                                | 0.61906                                | 0.00783           | 0.02487  | 0.99936 |
| 24    | 0.03245                                | 0.56625                                | 0.00349           | 0.02133  | 0.99968 |
| 26    | 0.03119                                | 0.52446                                | 0.0012            | 0.02461  | 0.99899 |
| 28    | 0.03378                                | 0.48537                                | 3.59E-04          | 0.02677  | 0.9998  |
| 30    | 0.05261                                | 0.45309                                | 1.14E-04          | 0.01256  | 0.99958 |

**Table S4.** Best fitted parameters ( $\chi_T$ ,  $\chi_S$ ,  $\tau$  and  $\alpha$ ) with the extended Debye model for compound  $^{163}\text{DyZn}_2$  at zero field in the temperature range 2-28 K.

| T / K | $\chi_S / \text{cm}^3 \text{mol}^{-1}$ | $\chi_T / \text{cm}^3 \text{mol}^{-1}$ | $\tau / \text{s}$ | $\alpha$ | $R^2$   |
|-------|----------------------------------------|----------------------------------------|-------------------|----------|---------|
| 2     | 0.17806                                | 7.45396                                | 0.36148           | 0.25266  | 0.99862 |
| 2.2   | 0.16695                                | 6.82998                                | 0.35441           | 0.25241  | 0.9986  |
| 2.4   | 0.15048                                | 6.19792                                | 0.34558           | 0.25354  | 0.99858 |
| 2.6   | 0.1409                                 | 5.70086                                | 0.33728           | 0.25413  | 0.99868 |
| 2.8   | 0.13374                                | 5.26501                                | 0.32849           | 0.25199  | 0.99868 |
| 3     | 0.12719                                | 4.90592                                | 0.32259           | 0.25321  | 0.99857 |
| 3.5   | 0.11278                                | 4.18015                                | 0.30443           | 0.2529   | 0.99861 |
| 4     | 0.10178                                | 3.63887                                | 0.28842           | 0.249    | 0.99878 |
| 4.5   | 0.0904                                 | 3.22248                                | 0.275             | 0.24879  | 0.9988  |
| 5     | 0.08482                                | 2.89185                                | 0.26382           | 0.24677  | 0.99874 |
| 6     | 0.06861                                | 2.40127                                | 0.24437           | 0.24534  | 0.99874 |
| 7     | 0.06362                                | 2.04674                                | 0.22742           | 0.23813  | 0.99867 |
| 8     | 0.05851                                | 1.77966                                | 0.21065           | 0.2284   | 0.99865 |
| 9     | 0.05422                                | 1.57321                                | 0.19198           | 0.21708  | 0.99857 |
| 10    | 0.05125                                | 1.40587                                | 0.17124           | 0.20153  | 0.99849 |
| 12    | 0.04521                                | 1.13776                                | 0.12313           | 0.15308  | 0.99844 |
| 14    | 0.04242                                | 0.96055                                | 0.08153           | 0.10621  | 0.99878 |
| 16    | 0.03439                                | 0.83136                                | 0.04959           | 0.07454  | 0.99925 |
| 18    | 0.03012                                | 0.73865                                | 0.02894           | 0.05778  | 0.99921 |
| 19    | 0.02664                                | 0.7036                                 | 0.0219            | 0.05958  | 0.9988  |
| 20    | 0.02656                                | 0.66321                                | 0.01622           | 0.03949  | 0.99948 |
| 21    | 0.02637                                | 0.62872                                | 0.0118            | 0.03095  | 0.99958 |
| 22    | 0.02151                                | 0.60139                                | 0.00807           | 0.03391  | 0.99974 |
| 24    | 0.02139                                | 0.55098                                | 0.00331           | 0.03245  | 0.99972 |
| 26    | 0.02256                                | 0.50763                                | 0.00109           | 0.03554  | 0.99972 |
| 28    | 0.02723                                | 0.47036                                | 3.28E-04          | 0.03235  | 0.99973 |

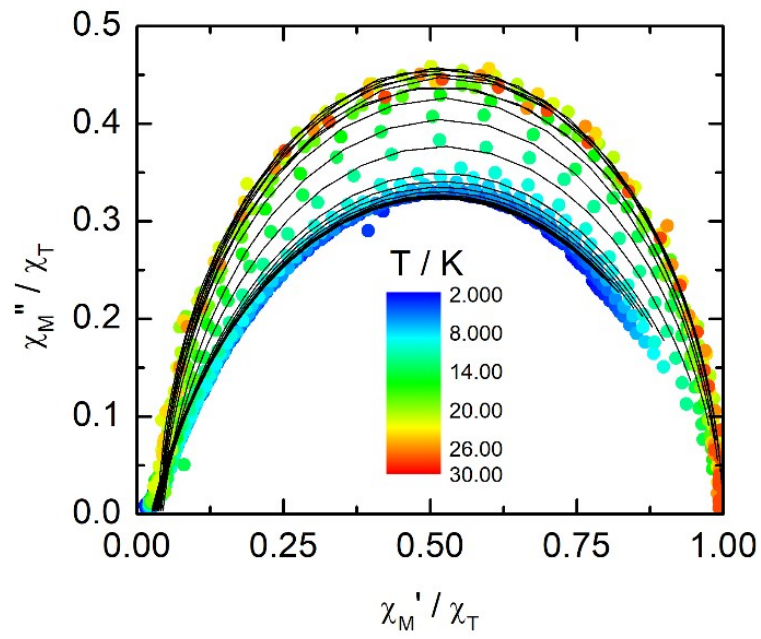

**Fig. S7** Normalized Cole-Cole plots in zero field for  $^{162}\text{DyZn}_2$  between 2 and 28 K.

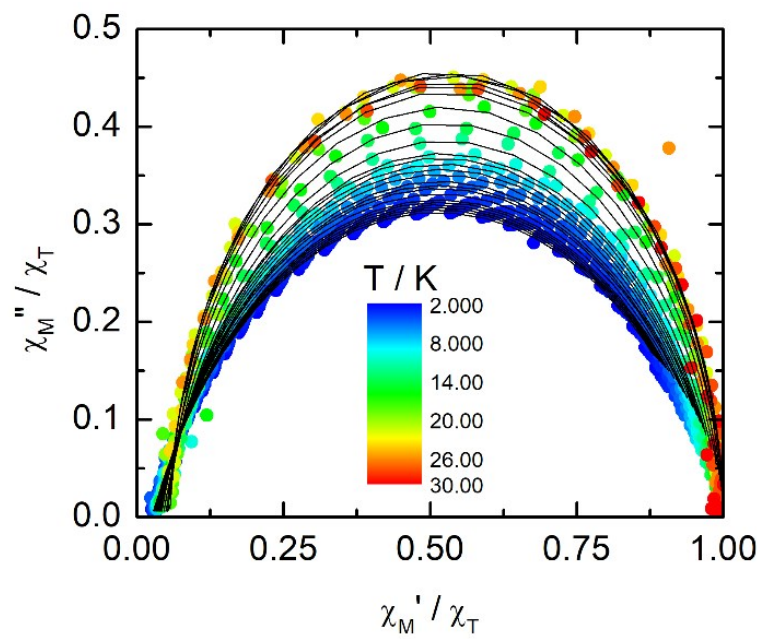

**Fig. S8** Normalized Cole-Cole plots in zero field for  $^{163}\text{DyZn}_2$  between 2 and 28 K.

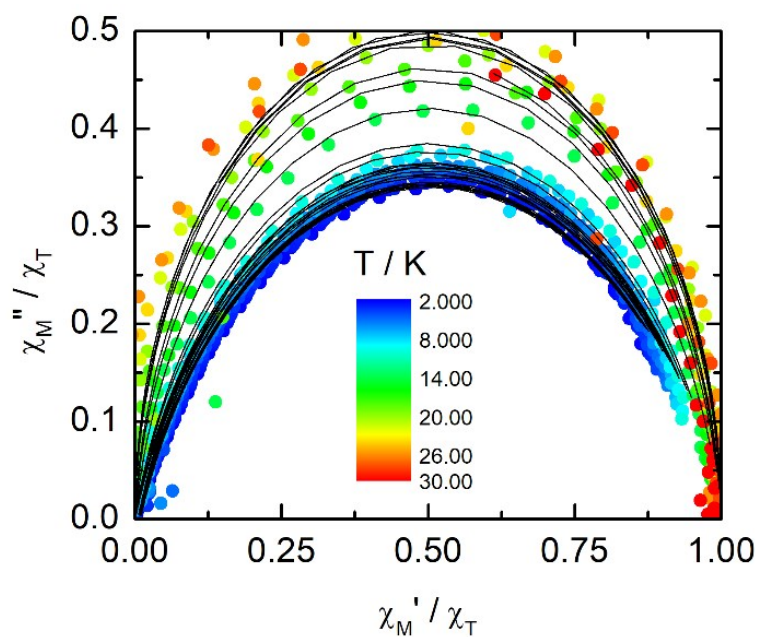

**Fig. S9** Normalized Cole-Cole plots in zero field for **DyZn<sub>2</sub>** between 2 and 30 K.

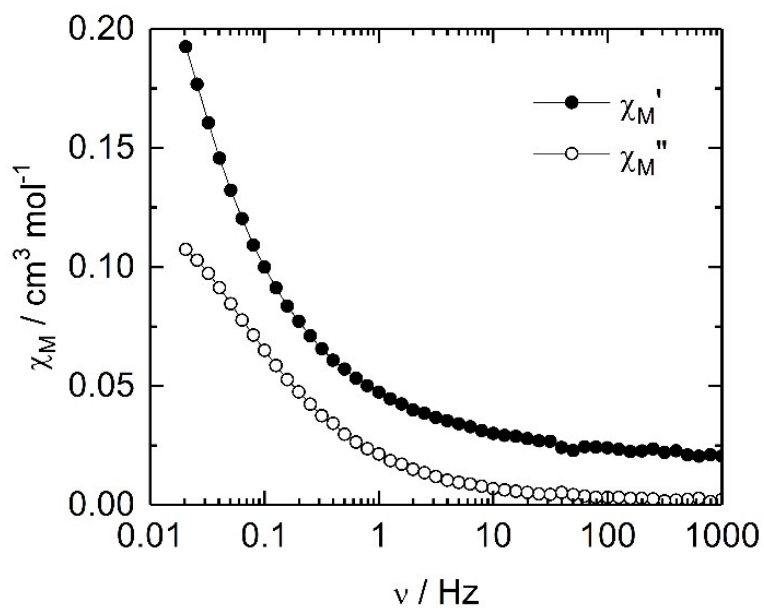

**Fig. S10** Frequency dependence of the in-phase ( $\chi_M'$ ) and out-of-phase ( $\chi_M''$ ) components of the ac susceptibility measured at 2 K and zero field for **(Dy@Y)Zn<sub>2</sub>**.

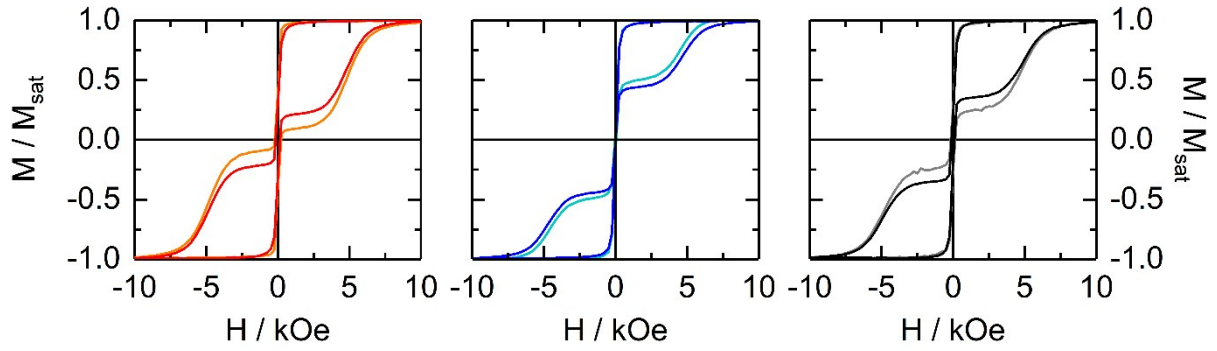

**Fig. S11** Comparison of the different condensed systems with their analogue diluted. Normalized magnetic hysteresis loops at 0.5 K and at a sweep rate of 16 Oe s<sup>-1</sup> for **DyZn<sub>2</sub>** (black), <sup>162</sup>**DyZn<sub>2</sub>** (red), <sup>163</sup>**DyZn<sub>2</sub>** (blue); and (b) the diluted **(Dy@Y)Zn<sub>2</sub>** (grey), <sup>162</sup>**(Dy@Y)Zn<sub>2</sub>** (orange) and <sup>163</sup>**(Dy@Y)Zn<sub>2</sub>** (light blue).

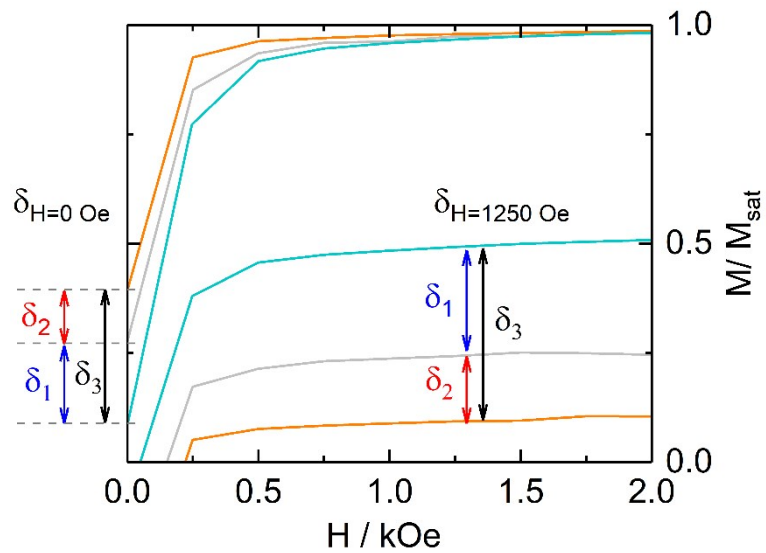

**Fig. S12** Zoom of the normalized magnetic hysteresis loops at 0.5 K and at a sweep rate of 16 Oe s<sup>-1</sup> for **(Dy@Y)Zn<sub>2</sub>** (grey), <sup>162</sup>**(Dy@Y)Zn<sub>2</sub>** (orange) and <sup>163</sup>**(Dy@Y)Zn<sub>2</sub>** (light blue) for the definition of  $\delta_1$ ,  $\delta_2$  and  $\delta_3$  parameters.

**Table S5.**  $\delta_1$ ,  $\delta_2$  and  $\delta_3$  parameters extracted from the normalized magnetic hysteresis loops for  $(\text{Dy@Y})\text{Zn}_2$ ,  $^{162}(\text{Dy@Y})\text{Zn}_2$  and  $^{163}(\text{Dy@Y})\text{Zn}_2$  at 0.5 K.

|                                                                              | H = 0 Oe | H = 1250 Oe | $\Delta^*$ |
|------------------------------------------------------------------------------|----------|-------------|------------|
| $\delta_1 (^{163}(\text{Dy@Y})\text{Zn}_2 - (\text{Dy@Y})\text{Zn}_2)$       | 0.1783   | 0.2469      | 0.0686     |
| $\delta_2 (^{162}(\text{Dy@Y})\text{Zn}_2 - (\text{Dy@Y})\text{Zn}_2)$       | 0.1271   | 0.1463      | 0.0192     |
| $\delta_3 (^{163}(\text{Dy@Y})\text{Zn}_2 - ^{162}(\text{Dy@Y})\text{Zn}_2)$ | 0.3058   | 0.3932      | 0.0874     |

\* $\Delta$  is defined as the absolute difference between  $\delta_n$  (n = 1-3) determined at H = 0 Oe and H = 1250 Oe.
